# Supplementary material for: Schottky heterojunction CeO2@MXene nanosheets with synergistic type I and type II PDT for anti-osteosarcoma
Source: Royal Society of Chemistry journal article supplement (doi:10.1039/d3tb02835f), 2024-01-01
Supplement: d3tb02835f1.pdf [file d3tb02835f1.pdf]

## Supplementary Information

### Schottky heterojunction CeO<sub>2</sub>@MXene nanosheets with synergistic type I and type II PDT for anti-osteosarcoma

*Bingxin Zheng,<sup>‡a</sup> Ranran Zhang,<sup>‡b</sup> Fei Kuang,<sup>‡c</sup> Tiankun Hui,<sup>‡b</sup> Chenchen Fu,<sup>b</sup> Li Zhang,<sup>d</sup>  
Chuanli Zhou,<sup>e</sup> Meng Qiu<sup>\*b</sup> and Bin Yue<sup>\*a</sup>*

a. Department of Orthopedic Oncology, The Affiliated Hospital of Qingdao University, Qingdao, Peoples Republic of China.

b. Key Laboratory of Marine Chemistry Theory and Technology (Ocean University of China), Ministry of Education, Qingdao 266100, China

c. Qingdao University, College of Life Sciences, 308 Ningxia Road, Qingdao, Shandong Province, China.

d. Department of Operating Room, The Affiliated Hospital of Qingdao University, Qingdao, People's Republic of China.

e. Department of Spinal Surgery, The Affiliated Hospital of Qingdao University, Qingdao, People's Republic of China.

<sup>‡</sup> Contributed equally to this work.

<sup>\*</sup> Corresponding author.

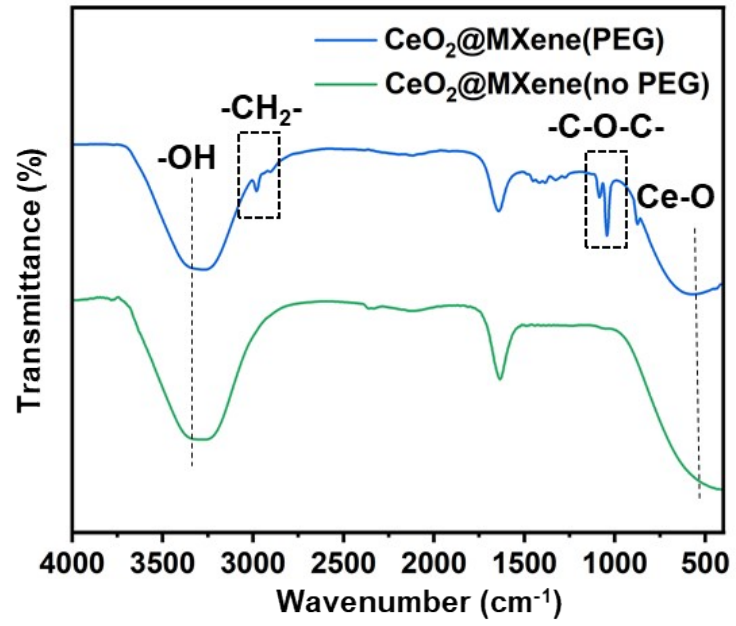

**Fig. S1** The FT-IR spectra of CeO<sub>2</sub>@MXene(PEG) and CeO<sub>2</sub>@MXene(no PEG).

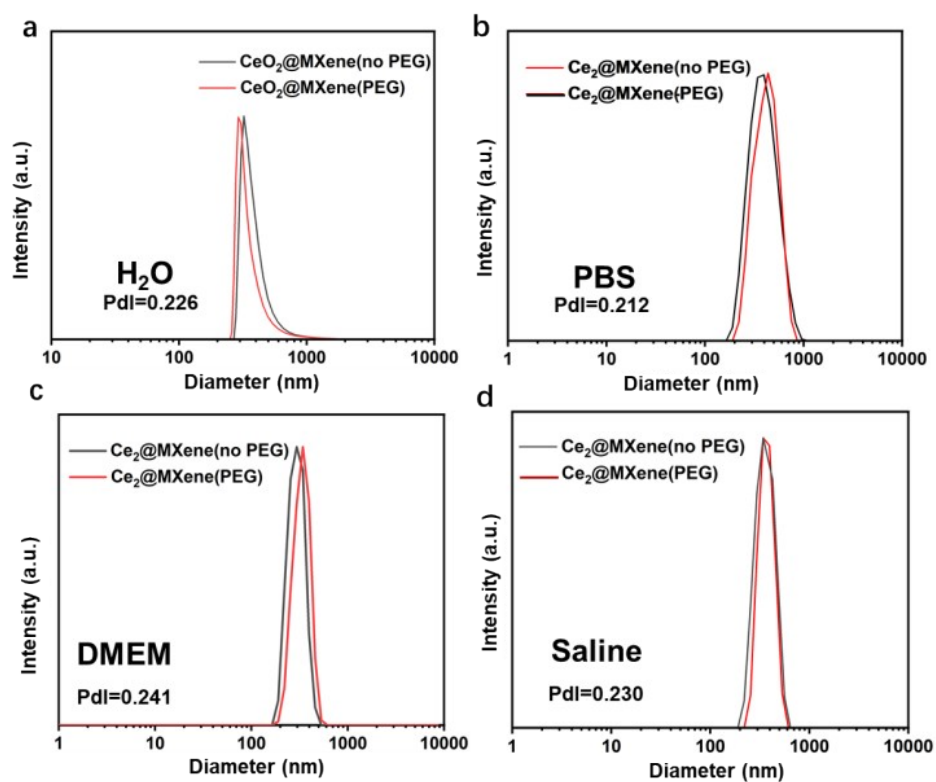

**Fig. S2** The size distribution diagram of  $\text{CeO}_2@MXene(PEG)$  and  $\text{CeO}_2@MXene(\text{no PEG})$  in different media.

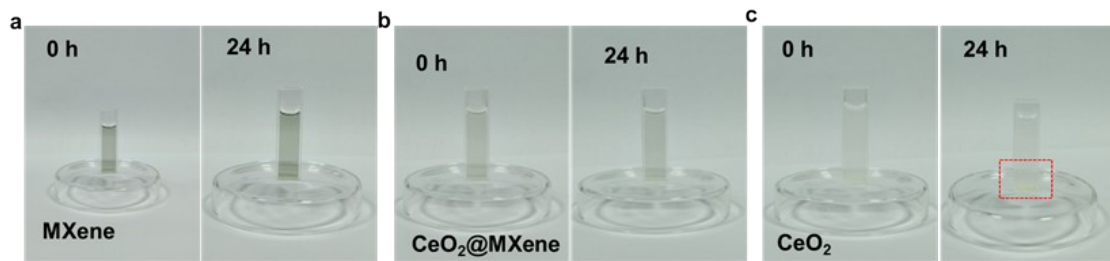

**Fig. S3** Digital images of the materials dispersed in the solution.

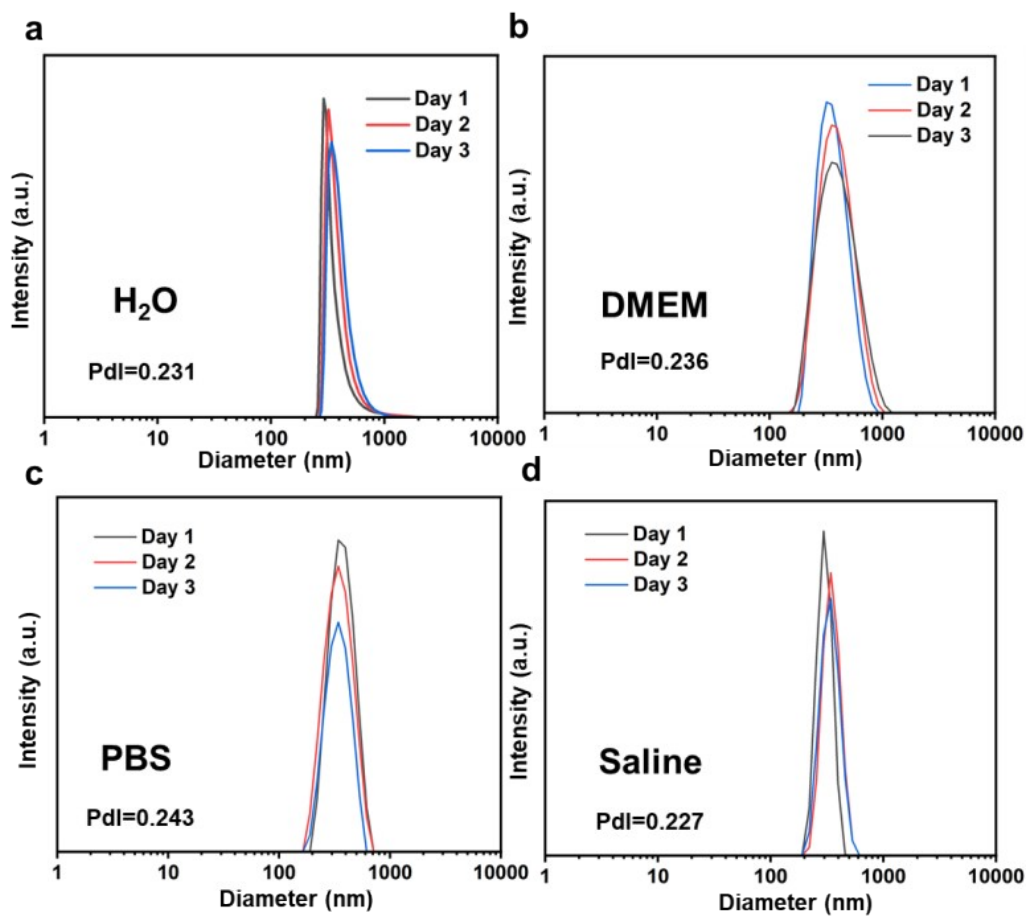

**Fig. S4** The size distribution diagram of  $\text{CeO}_2@\text{MXene}(\text{PEG})$  in different media within 3 days.

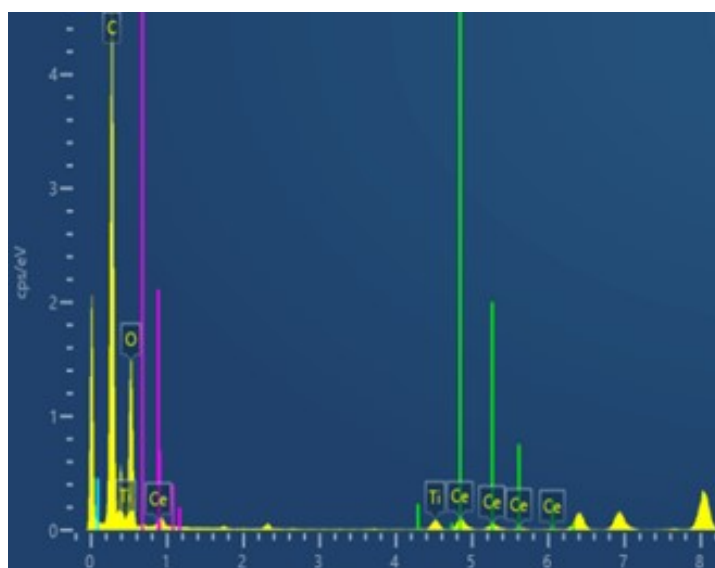

**Fig. S5** Scanning spectrum of CeO<sub>2</sub>@ MXene.

| Elements | Mass percent | Atomic percent |
|----------|--------------|----------------|
| C        | 9.31         | 22.10          |
| O        | 26.89        | 47.91          |
| Ti       | 43.41        | 25.84          |
| Ce       | 20.38        | 4.15           |

**Fig. S6** Contents of elements in CeO<sub>2</sub>@MXene.

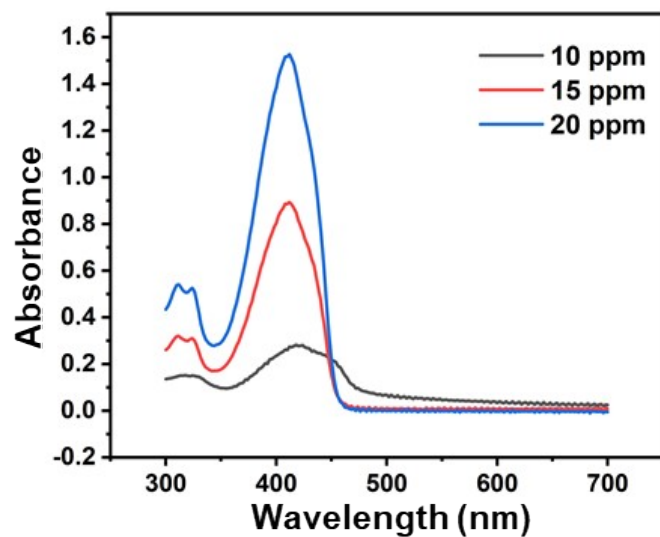

**Fig. S7** Absorption spectra of CeO<sub>2</sub>@MXene at different concentrations.



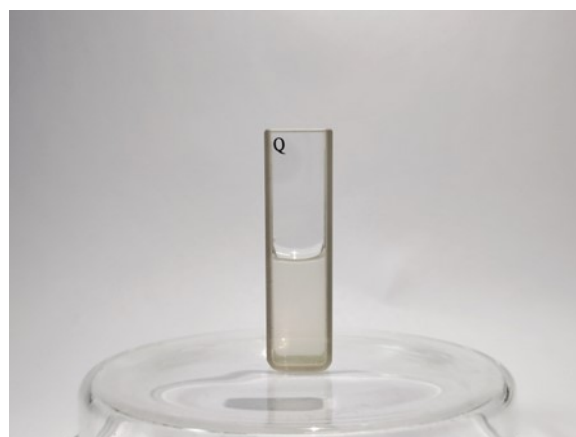

before

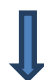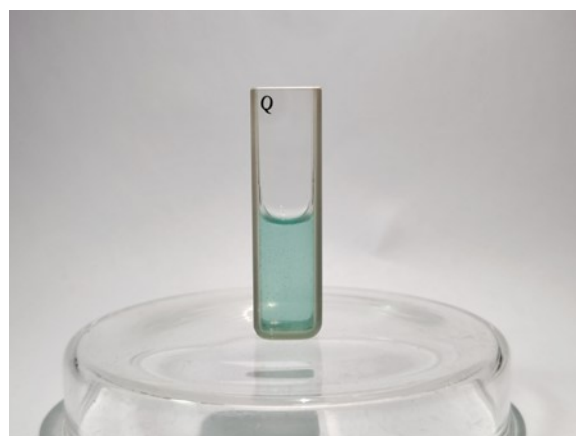

After

**Fig. S8** Comparison of color changes before and after the color response of TMB and  $\bullet\text{OH}$ .

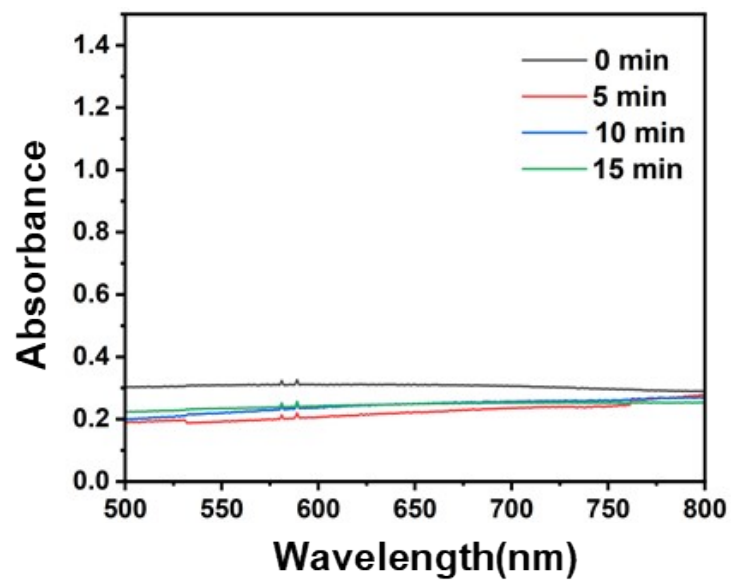

Fig. S9 Absorption spectra of TMB under different NIR irradiation time.

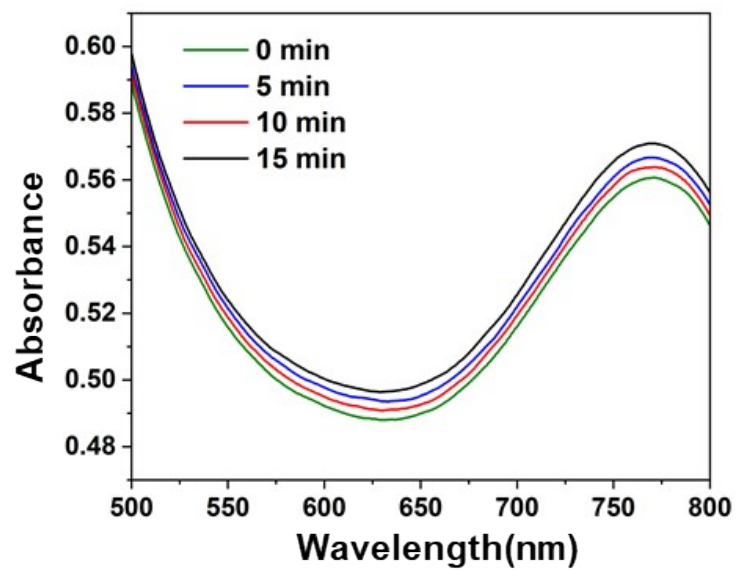

**Fig. S10** Using TMB as probe, the formation of  $\bullet\text{OH}$  generated by MXene was detected under different NIR irradiation time.

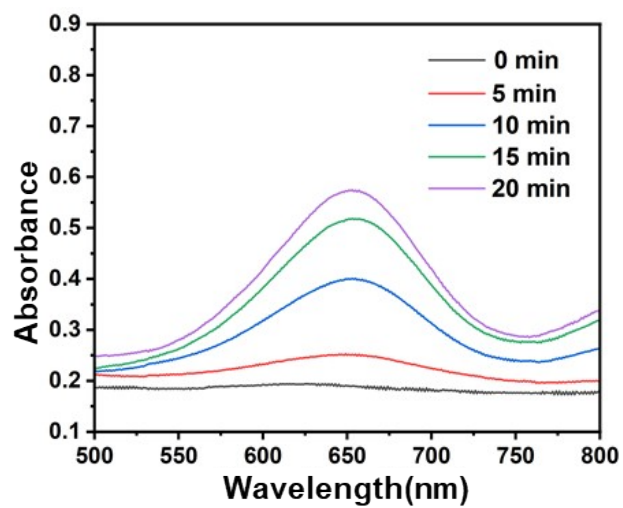

**Fig. S11** Using TMB as probe, the formation of  $\bullet\text{OH}$  generated by  $\text{CeO}_2$  was detected under different NIR irradiation time.

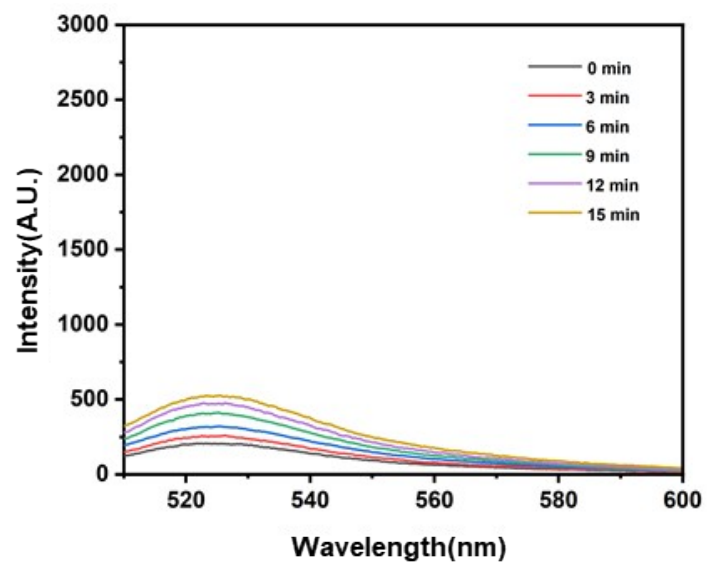

**Fig. S12** Fluorescence spectra of DHR 123 fluorescent probe under different NIR irradiation time.

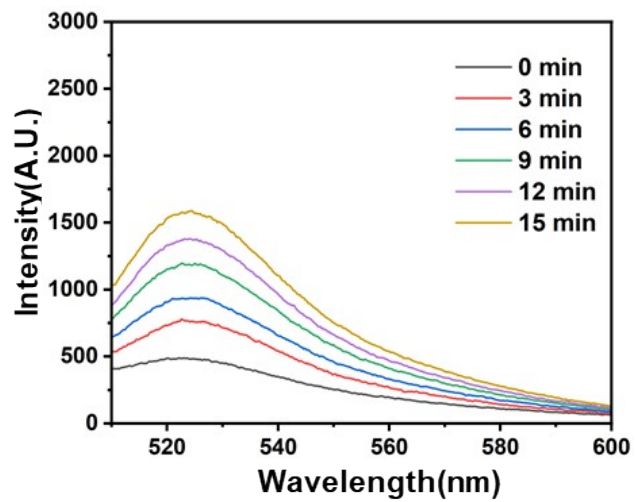

**Fig. S13** DHR123 was used as a fluorescent probe to detect the formation of  $O_2^-$  generated by  $CeO_2$  under different NIR irradiation time.

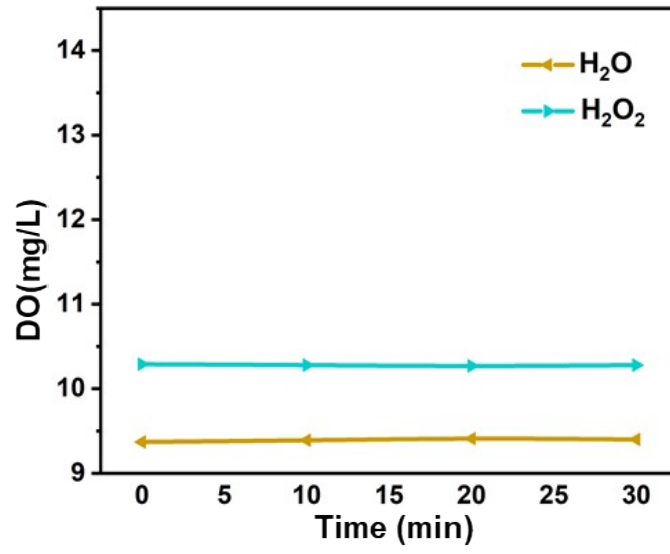

**Fig. S14** Comparison of dissolved oxygen content in H<sub>2</sub>O<sub>2</sub> and H<sub>2</sub>O.

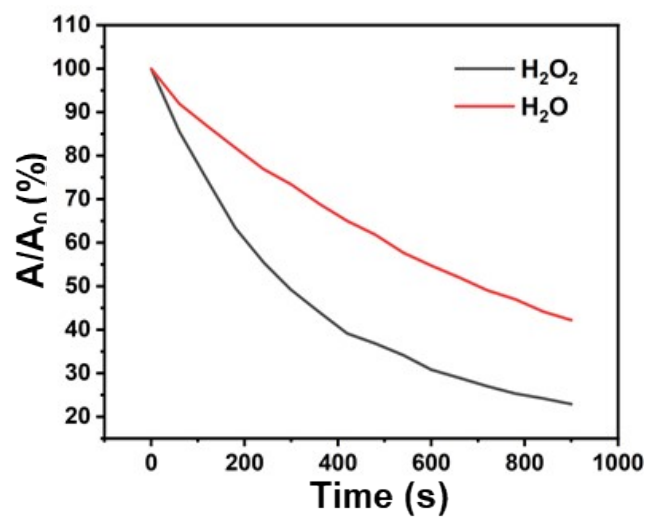

**Fig. S15** Comparison of singlet oxygen production in two different liquid environments.



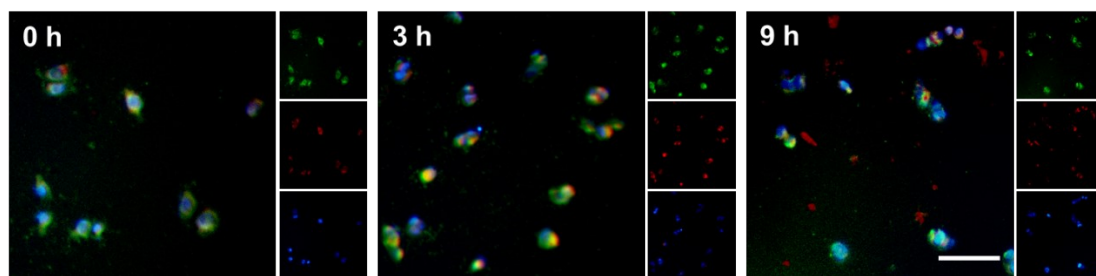

**Fig. S16** The intracellular lysosome escape of MXene@CeO<sub>2</sub> in different time.
